# Supplementary material for: Quality and Readability of Google Search Information on HoLEP for Benign Prostate Hyperplasia
Source: Preprints.org preprint supplement (doi:10.20944/preprints202403.0321.v1), 2024-03-06
Supplement: Supplementary file 1 [file supplementary]

**Supplementary information:**

**Table S1 – MBS item statistics report based on MBS item number, demonstrating services per capita/per 100,000 population in 2022 regarding BPH procedures.**

| **Procedure** | **Medicare item number** | **Total services per 100,000 population** |
| --- | --- | --- |
| Prostatic urethral lift (PUL) | 36811 | 4 |
| Transurethral incision of prostate (TUIP) | 36854 | 5 |
| Open prostatectomy | 37200 | 1 |
| Transurethral radiofrequency needle ablation (TUNA) | 37201 | 2 |
| Transurethral resection of prostate (TURP) | 37203 | 40 |
| Photoselective vaporization of prostate (PVP) | 37207 | 7 |
| Transurethral microwave thermoablation (TUMT) | 37230 | 0 |
| Holmium:YAG laser enucleation of prostate (HoLEP) | 37245 | 6 |

**S2 data:**

With the post hoc GH test, there were significant differences within the subsection scores. For the subsection 1 scores, significant differences were between bottom and top rank webpage, mean difference= -5.58 (-7.59 to – 3.57) p<0.001; between bottom and middle rank webpage, mean difference= -3.320 (−5.970 to −0.671) p<0.011.

For the subsection 2 score, significant difference was between bottom and top rank webpage, mean difference= -3.136 (−5.632 to −0.640) p=0.01.

Lastly, for the subsection 3 score, significant differences were between bottom and top rank webpage mean difference= -1.246 (−1.584 to −0.909) p<0.001; between bottom and middle rank webpage, mean difference= -0.543 (−1.055 to −0.031) p=0.035; between middle and top rank webpage, mean difference= -0.703 (−1.265 to −0.142).
